# Supplementary material
Source: PubMed Central journal article supplement (PMC9007595)
Supplement: NIHMS1784357-supplement-Harnagel_SI.pdf [file NIHMS1784357-supplement-Harnagel_SI.pdf]

Nonredundant functions of *Mycobacterium tuberculosis* chaperones promote survival under stress

Alexa Harnagel,<sup>1</sup> Landys Lopez Quezada,<sup>2</sup> Sae Woong Park,<sup>2</sup> Catherine Baranowski,<sup>3</sup> Karen Kieser,<sup>3</sup> Xiuju Jiang,<sup>2</sup> Julia Roberts,<sup>2</sup> Julien Vaubourgeix,<sup>2,5</sup> Amy Yang,<sup>1</sup> Brock Nelson,<sup>1</sup> Allison Fay,<sup>4</sup> Eric Rubin,<sup>4</sup> Sabine Ehrt,<sup>2</sup> Carl F. Nathan,<sup>2</sup> Tania J. Lupoli<sup>1,2</sup>

<sup>1</sup>Department of Chemistry, New York University, United States

<sup>2</sup>Department of Microbiology and Immunology, Weill Cornell Medicine, United States

<sup>3</sup>Department of Immunology and Infectious Disease, Harvard T.H. Chan School of Public Health, United States

<sup>4</sup>Immunology Program, Sloan Kettering Institute, United States

<sup>5</sup>MRC Centre for Molecular Bacteriology and Infection, Imperial College London, London, United Kingdom

**Supplementary Information**

**Table S1. Genes and intergenic regions with highest number of TA insertions for each transposon library.**

| <b>RANK</b> | <b>wildtype 1</b>     | <b><math>\Delta clpB</math> 1</b> | <b>wildtype 2</b>     | <b><math>\Delta clpB</math> 2</b> |
|-------------|-----------------------|-----------------------------------|-----------------------|-----------------------------------|
| 1*          | 'IG_Rv0905'<br>(5274) | 'IG_Rv0905'<br>(10123)            | 'IG_Rv0905'<br>(4629) | 'IG_Rv0905'<br>(19444)            |
| 2           | 'Rv1151c'<br>(2600)   | 'IG_Rv1072'<br>(5115)             | 'Rv1151c'<br>(2332)   | 'IG_Rv1072'<br>(11475)            |
| 3           | 'IG_Rv1072'<br>(2385) | 'Rv0270'<br>(3810)                | 'IG_Rv1072'<br>(2234) | 'Rv1151c'<br>(10907)              |
| 4           | 'Rv0819'<br>(2128)    | 'Rv1211'<br>(3754)                | 'Rv0819'<br>(2077)    | 'Rv0819'<br>(9383)                |
| 5           | 'IG_Rv0002'<br>(2082) | 'Rv1549'<br>(3479)                | 'IG_Rv0820'<br>(2059) | 'Rv1211'<br>(8170)                |

Number of insertions is shown in parentheses.

\* For each library, the gene with the highest number of TA insertions (seen as the highest peak in **Figure S1**) is the intergenic (IG) region of Rv0905, a possible enoyl-CoA hydratase EchA6 that is predicted to be nonessential. This “hotspot” might be a preferred insertion point due to accessibility because of chromosome structure, although further experimentation would be needed to understand this possibility.

**Table S2. Percent TA dinucleotides disrupted for each library**

| <b>library</b>  | <b>%TAs disrupted</b> |
|-----------------|-----------------------|
| wildtype 1      | 79.2                  |
| $\Delta clpB$ 1 | 60.3                  |
| wildtype 2      | 74.0                  |
| $\Delta clpB$ 2 | 51.4                  |

**Table S3. Pathway analysis of genes significantly underrepresented in Mtb  $\Delta$ *clpB* libraries relative to wild-type ( $p < 0.001$ ) that fall into indicated pathways.**

| pathway/Rv number                    | gene          | GO Term Annotations |
|--------------------------------------|---------------|---------------------|
| <b>Mycobactin synthesis</b>          |               |                     |
| Rv2384                               | <i>mbtA</i>   | GOA:P71716          |
| Rv2383c                              | <i>mbtB</i>   | GOA:P9WQ63          |
| Rv2382c                              | <i>mbtC</i>   | GOA:P71718          |
| Rv2381c                              | <i>mbtD</i>   | GOA:P71719          |
| Rv2380c                              | <i>mbtE</i>   | GOA:I6Y0L1          |
| Rv2379c                              | <i>mbtF</i>   | GOA:O05819          |
| <b>Sulfur metabolism</b>             |               |                     |
| Rv2397c                              | <i>cysA1</i>  | GOA:P9WQM1          |
| Rv1286                               | <i>cysN</i>   | GOA:P9WNNM5         |
| Rv1285                               | <i>cysD</i>   | GOA:P9WIK1          |
| Rv2847c                              | <i>cysG</i>   | GOA:I6X5I7          |
| Rv2398c                              | <i>cysW</i>   | GOA:P71746          |
| Rv2391                               | <i>sirA</i>   | GOA:P9WJ03          |
| Rv2400c                              | <i>subI</i>   | GOA:P71744          |
| <b>Lipid metabolism</b>              |               |                     |
| Rv1185c                              | <i>fadD21</i> | GOA:P9WQ49          |
| Rv1529                               | <i>fadD24</i> | GOA:O53903          |
| Rv0404                               | <i>fadD30</i> | GOA:P9WQ57          |
| Rv2505c                              | <i>fadD35</i> | GOA:I6Y0X0          |
| Rv0551c                              | <i>fadD8</i>  | GOA:O06417          |
| Rv0904c                              | <i>accD3</i>  | GOA:P9WQH9          |
| Rv1183                               | <i>mmpl10</i> | GOA:P9WJU1          |
| Rv0507                               | <i>mmpl2</i>  | GOA:P9WJV7          |
| Rv3823c                              | <i>mmpl8</i>  | GOA:P9WJU5          |
| Rv2339                               | <i>mmpl9</i>  | GOA:P9WJU3          |
| Rv1683                               | NA            | GOA:O33185          |
| Rv0101                               | <i>nrp</i>    | GOA:Q10896          |
| Rv2048c                              | <i>pks12</i>  | GOA:I6XD69          |
| Rv1181                               | <i>pks4</i>   | GOA:LOT647          |
| Rv1527c                              | <i>pks5</i>   | GOA:O53901          |
| Rv0405                               | <i>pks6</i>   | GOA:O86335          |
| Rv1661                               | <i>pks7</i>   | GOA:P94996          |
| Rv1662                               | <i>pks8</i>   | GOA:O65933          |
| Rv1664                               | <i>pks9</i>   | GOA:O06586          |
| Rv2931                               | <i>ppsA</i>   | GOA:P9WQE7          |
| Rv2932                               | <i>ppsB</i>   | GOA:P9WQE5          |
| Rv2933                               | <i>ppsC</i>   | GOA:P96202          |
| Rv2934                               | <i>ppsD</i>   | GOA:P9WQE3          |
| Rv2935                               | <i>ppsE</i>   | GOA:P9WQE1          |
| Rv1182                               | <i>papA3</i>  | GOA:P9WIK5          |
| Rv2518c                              | <i>ldtB</i>   | GOA:I6Y9J2          |
| <b>Starch and sucrose metabolism</b> |               |                     |
| Rv1328                               | <i>glgP</i>   | GOA:P9WMW1          |
| Rv3490                               | <i>otsA</i>   | GOA:P9WN11          |
| Rv2006                               | <i>otsB1</i>  | GOA:P9WN15          |
| Rv0946c                              | <i>pgi</i>    | GOA:P9WN69          |
| <b>Nitrogen metabolism</b>           |               |                     |
| Rv2476c                              | <i>gdh</i>    | GOA:O53203          |
| Rv1161                               | <i>narG</i>   | GOA:P9WJQ3          |
| Rv1736c                              | <i>narX</i>   | GOA:P9WJQ1          |
| <b>Carbon metabolism</b>             |               |                     |
| Rv0973c                              | <i>accA2</i>  | GOA:P71538          |
| Rv1552                               | <i>frdA</i>   | GOA:P9WN91          |
| Rv2967c                              | <i>pca</i>    | GOA:I6YEU0          |
| Rv1617                               | <i>pykA</i>   | GOA:P9WKE5          |
| <b>Proteostasis</b>                  |               |                     |
| Rv2299c                              | <i>htpG</i>   | GOA:P9WMJ7          |
| Rv2112c                              | <i>dop</i>    | GOA:P9WNU9          |
| <b>Predicted protein synthesis</b>   |               |                     |
| Rv1300                               | <i>hemK</i>   | GOA:P9WHV3          |
| Rv0120c                              | <i>fusA2</i>  | GOA:P9WNNM9         |
| Rv2404c                              | <i>lepA</i>   | GOA:P9WK97          |

Additional genes that have  $p < 0.001$  are not shown because they do not group into known pathways. Pathways were assigned by KEGG analysis and/or through manual annotation based on that of Mycobrowser (<https://mycobrowser.epfl.ch/>). GO Terms can be found at: <https://www.ebi.ac.uk/QuickGO/>

**Table S4. Fraction of TA sites hit in Rv2299c (*htpG*) (out of 30 TA sites total) and reads/TA site in indicated transposon libraries generated in this study.**

| library                                 | # of hit TAs | fraction TAs | total reads | avg. read/TA |
|-----------------------------------------|--------------|--------------|-------------|--------------|
| <b>Wild-type 1</b>                      | 26           | 0.867        | 1397        | 46.6         |
| <b>Wild-type 2</b>                      | 27           | 0.900        | 1389        | 46.3         |
| <b><math>\Delta</math><i>clpB</i> 1</b> | 21           | 0.700        | 668         | 22.3         |
| <b><math>\Delta</math><i>clpB</i> 2</b> | 20           | 0.667        | 398         | 13.3         |

**Table S5. Top five “hits” from proteomic analysis of excised band from His-HtpG pull-down in mycobacterial lysate.**

| Accession     | Protein                         | <i>M. tuberculosis</i> |             | <i>E. coli</i> |            | MW (kD) |
|---------------|---------------------------------|------------------------|-------------|----------------|------------|---------|
|               |                                 | peptides*              | % coverage# | peptides       | % coverage |         |
| <b>P0A5B9</b> | DnaK                            | 89                     | 82.24       | -              | -          | 66.8    |
| <b>P0A5B9</b> | ArnA                            | -                      | -           | 41             | 62.58      | 74.2    |
| <b>P63531</b> | GlgE                            | 35                     | 62.34       | -              | -          | 78.6    |
| <b>O53475</b> | Uncharacterized protein Rv2030c | 36                     | 61.09       | -              | -          | 74.9    |
| <b>P64411</b> | HtpG                            | 40                     | 58.42       | -              | -          | 72.9    |

From Colloidal blue-stained replicate gel to that shown in **Figure S12A**; sorted by percent coverage values.

\*peptides = number of peptides identified from indicated protein

#percent coverage = total percent sequence coverage

MW = molecular weight

**Table S6. Minimum inhibitory concentrations (MICs) for 90% growth inhibition of geldanamycin against Mtb strains with and without indicated chaperones under standard growth (replicating) conditions.**

| <b>Strains</b>     | <b>Rifampicin</b> | <b>Geldanamycin</b> |
|--------------------|-------------------|---------------------|
| Wild-type          | 0.125             | >100                |
| $\Delta clpB$      | 0.125             | >100                |
| $\Delta clpB$ comp | 0.125             | >100                |
| $\Delta htpG$      | 0.125             | >100                |
| $\Delta htpG$ comp | 0.125             | >100                |

**Table S7. Plasmids used in this study.**

| NO. | PLASMID NAME          | DESCRIPTION                                                                                                                                                     | SOURCE                                                          |
|-----|-----------------------|-----------------------------------------------------------------------------------------------------------------------------------------------------------------|-----------------------------------------------------------------|
| 1   | pETHisSUMO            | pET His6 Sumo TEV LIC cloning vector (ampR)                                                                                                                     | Addgene #29711                                                  |
| 2   | pHYRS52               | His6- <i>S. cerevisiae</i> ulp1 (res. 403-621) (ampR)                                                                                                           | Addgene #31122;<br>(Muona, Aranko, & Iwai, 2008)                |
| 3   | pET-47b(+)            | N-terminal His6 (kanR)                                                                                                                                          | Novagen                                                         |
| 4   | pET-27b(+)            | C-terminal His6 (kanR)                                                                                                                                          | Novagen                                                         |
| 4   | EcTL08                | pET-His-SUMO-htpG (Mtb)                                                                                                                                         | (Lopez Quezada et al., 2020)                                    |
| 5   | EcTL21                | pET47b-His-htpG (Mtb)                                                                                                                                           | This work                                                       |
| 6   | EcTL30                | pET27b-htpG-His(Mtb)                                                                                                                                            | This work                                                       |
| 7   | pEVOLV-pBpF           | tRNA synthetase/tRNA pair for the in vivo incorporation of p-benzoyl-L-phenylalanine into proteins in <i>E. coli</i> in response to the amber codon, TAG (camR) | Addgene # 31190;<br>(Chin, Martin, King, Wang, & Schultz, 2002) |
| 8   | pAJF550               | pET-SUMO-cys-grpE-cys                                                                                                                                           | This work                                                       |
| 9   | pAJF551               | pET-SUMO-cys-dnaK-cys                                                                                                                                           | This work                                                       |
| 10  | pDE43-XSTS            | temperature-sensitive plasmid for deletion in Mtb                                                                                                               | Gateway*                                                        |
| 11  | pEN21A KO Mtb clpB    | Gateway entry vector encoding part of Mtb <i>clpB</i>                                                                                                           | (Vaubourgeix et al., 2015)                                      |
| 12  | pEN41A KO Mtb clpB    | Gateway entry vector encoding part of Mtb <i>clpB</i>                                                                                                           | (Vaubourgeix et al., 2015)                                      |
| 13  | pEN12A-kanR-lox2      | Gateway entry made with a BP reaction using vector 14 and a kanR region amplified using primers 49 and 50 and plasmid 3 as a template                           | This work                                                       |
| 14  | pDO221A               | Gateway entry vector                                                                                                                                            | Gateway*                                                        |
| 15  | pDO23A                | Gateway entry vector                                                                                                                                            | Gateway*                                                        |
| 16  | pKO-XSTS-clpB-tb      | Mtb <i>clpB</i> deletion vector (kanR) made through an LR reaction with plasmids 11, 12, PvuII-digested 13                                                      | This work                                                       |
| 17  | pMCH_pre500_SD_htpG   | Plasmid that will introduce an extra copy of <i>htpG</i> into the Mtb chromosome at L5                                                                          | This work                                                       |
| 18  | pTCS-mcs1             | Plasmid to introduce a streptomycin resistance cassette into the Mtb chromosome at L5                                                                           | (Venugopal et al., 2011)*                                       |
| 19  | pLJR965               | CRISPRi backbone for Mtb                                                                                                                                        | (Rock et al., 2017)                                             |
| 20  | pTL_965_htpG_crispr_1 | Mtb <i>htpG</i> depletion vector (used primers 5,6) encoding sgRNA1                                                                                             | This work                                                       |
| 21  | pTL_965_htpG_crispr_2 | Mtb <i>htpG</i> depletion vector (used primers 7,8) encoding sgRNA2                                                                                             | This work                                                       |
| 22  | pET27b_HtpG F10TAG    | Plasmid 6 with indicated residue's encoding codon mutated to TAG                                                                                                | This work                                                       |
| 23  | pET27b_HtpG W197TAG   | Plasmid 6 with indicated residue's encoding codon mutated to TAG                                                                                                | This work                                                       |
| 24  | pET27b_HtpG W274TAG   | Plasmid 6 with indicated residue's encoding codon mutated to TAG                                                                                                | This work                                                       |
| 25  | pET27b_HtpG F303TAG   | Plasmid 6 with indicated residue's encoding codon mutated to TAG                                                                                                | This work                                                       |
| 26  | pET27b_HtpG F559TAG   | Plasmid 6 with indicated residue's encoding codon mutated to TAG                                                                                                | This work                                                       |
| 27  | pET27b_HtpG Y618TAG   | Plasmid 6 with indicated residue's encoding codon mutated to TAG                                                                                                | This work                                                       |
| 28  | pET27b_HtpG Y423TAG   | Plasmid 6 with indicated residue's encoding codon mutated to TAG                                                                                                | This work                                                       |
| 29  | pET27b_HtpG F395TAG   | Plasmid 6 with indicated residue's encoding codon mutated to TAG                                                                                                | This work                                                       |
| 30  | pET27b_HtpG F337TAG   | Plasmid 6 with indicated residue's encoding codon mutated to TAG                                                                                                | This work                                                       |
| 31  | pET27b_HtpG R53TAG    | Plasmid 6 with indicated residue's encoding codon mutated to TAG                                                                                                | This work                                                       |

| NO. | PLASMID NAME        | DESCRIPTION                                                      | SOURCE                |
|-----|---------------------|------------------------------------------------------------------|-----------------------|
| 32  | pET27b_HtpG T236TAG | Plasmid 6 with indicated residue's encoding codon mutated to TAG | This work             |
| 33  | pET27b_HtpG E257TAG | Plasmid 6 with indicated residue's encoding codon mutated to TAG | This work             |
| 34  | pET27b_HtpG R384TAG | Plasmid 6 with indicated residue's encoding codon mutated to TAG | This work             |
| 35  | pET27b_HtpG D510TAG | Plasmid 6 with indicated residue's encoding codon mutated to TAG | This work             |
| 36  | pET27b_HtpG H269TAG | Plasmid 6 with indicated residue's encoding codon mutated to TAG | This work             |
| 37  | pET27b_HtpG W529TAG | Plasmid 6 with indicated residue's encoding codon mutated to TAG | This work             |
| 38  | pET27b_HtpG F635TAG | Plasmid 6 with indicated residue's encoding codon mutated to TAG | This work             |
| 39  | pACYC-T7 yHsp90     | N-terminal His6 <i>S. cerevisiae</i> Hsp82                       | (Wayne & Bolon, 2007) |

ampR = ampicillin resistant; kanR = kanamycin resistant; camR = chloramphenicol resistant

\*We would like to acknowledge the Schnappinger lab (Weill Cornell Medicine) for the generous gift of these plasmids

Note: See "Experimental Procedures" for description of cloning of vectors that are not fully described in this table.

**Table S8: Strains used in this study.**

| NO.   | STRAIN NAME                           | DESCRIPTION                                                                                               | SOURCE                                              |
|-------|---------------------------------------|-----------------------------------------------------------------------------------------------------------|-----------------------------------------------------|
| 1     | H37RvN                                | <i>M. tuberculosis</i> wild-type strain                                                                   | Nathan lab stock                                    |
| 2     | Rosetta2                              | <i>E. coli</i> BL21 derivative for rare codon usage                                                       | Novagen                                             |
| 3     | Rosetta2(DE3) pLysS                   | Rosetta2 expressing T7 lysozyme                                                                           | Novagen                                             |
| 4     | His6-SUMO-HtpG                        | Rosetta2 transformed with EcTL08                                                                          | (Lopez Quezada et al., 2020)                        |
| 5     | His6-HtpG                             | BL21 transformed with EcTL21                                                                              | This work                                           |
| 6     | <i>Mtb ΔclpB</i>                      | <i>Mtb</i> with <i>clpB</i> deleted                                                                       | (Vaubourgeix et al., 2015)                          |
| 7     | <i>Mtb ΔclpB</i> complement           | Strain 7 carrying an extra copy of <i>clpB</i> following the native promoter                              | (Vaubourgeix et al., 2015)                          |
| 8     | <i>Mtb ΔhtpG</i>                      | <i>Mtb</i> with <i>htpG</i> deleted                                                                       | (Lopez Quezada et al., 2020)                        |
| 9     | <i>Mtb ΔhtpG</i> complement           | Strain 8 carrying an extra copy of <i>htpG</i> following the <i>hsp60</i> promoter                        | (Lopez Quezada et al., 2020)                        |
| 10    | <i>Mtb ΔclpB</i> kanR                 | <i>Mtb</i> with <i>clpB</i> deleted and replaced with a kanamycin resistant cassette                      | This work                                           |
| 11    | <i>Mtb ΔclpB</i> pre500htpG           | Strain 10 transformed with plasmid 17; carries <i>hspR</i> SNP (A19V)                                     | This work                                           |
| 12    | <i>Mtb ΔclpB</i> kanR <i>hspR</i> SNP | Strain 11 transformed with plasmid 18; carries <i>hspR</i> A19V without an additional copy of <i>htpG</i> | This work                                           |
| 13    | HtpG-His6                             | BL21 transformed with EcTL30                                                                              | This work                                           |
| 14-30 | HtpG_His6 BpF mutants                 | BL21 transformed with pEVOLV-BpF and with a single plasmid 22-38                                          | This work                                           |
| 31    | EcTL02                                | Rosetta2 expressing His6-SUMO-Mtb ClpB                                                                    | (Lupoli, Fay, Adura, Glickman, & Nathan, 2016)      |
| 32    | EcTL03                                | Rosetta2 expressing His6-SUMO-Mtb DnaJ1                                                                   | (Lupoli et al., 2016)                               |
| 33    | EcTL04                                | Rosetta2 expressing His6-SUMO-Mtb DnaJ2                                                                   | (Lupoli et al., 2016)                               |
| 34    | EcTL05                                | Rosetta2 expressing His6-SUMO-Mtb GrpE                                                                    | (Lupoli et al., 2016)                               |
| 35    | EcTL06                                | Rosetta2 expressing His6-SUMO-Mtb DnaK                                                                    | Nathan lab stock                                    |
| 36    | mc <sup>2</sup> 155                   | <i>M. smegmatis</i> wild-type strain                                                                      | (Vaubourgeix et al., 2015)                          |
| 37    | <i>M. smegmatis ΔclpB</i>             | <i>M. smegmatis</i> with <i>clpB</i> deleted                                                              | (Vaubourgeix et al., 2015)                          |
| 38    | <i>M. smegmatis ΔclpB</i> complement  | Strain 36 carrying an extra copy of <i>clpB</i> following the native promoter                             | (Vaubourgeix et al., 2015)                          |
| 39    | <i>M. smegmatis ΔmbtE</i>             | <i>M. smegmatis</i> with <i>mbtE</i> deleted                                                              | (LaMarca, Zhu, Arceneaux, Byers, & Lundrigan, 2004) |
| 40    | <i>Mtb ΔmbtK</i>                      | <i>Mtb</i> with <i>mbtK</i> deleted                                                                       | (Xu et al., 2017)                                   |





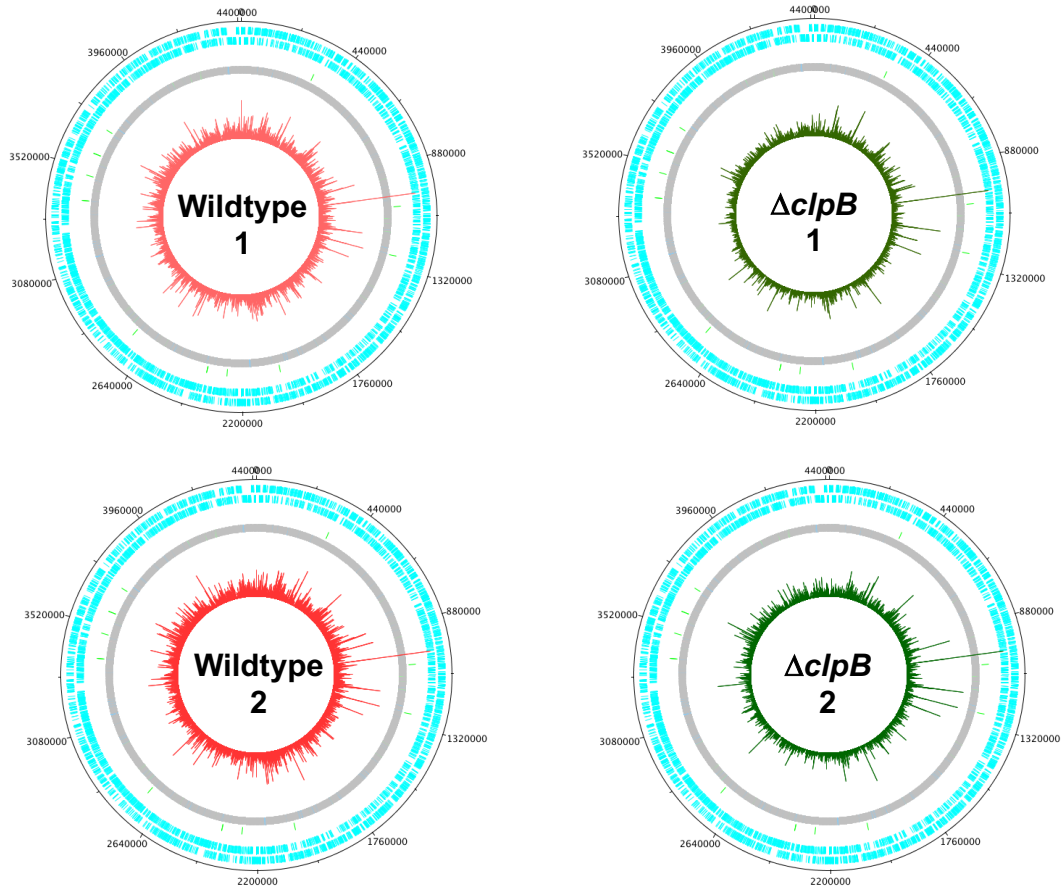

**Figure S1. The sequence reads from replicate Mtb transposon libraries in wild-type (red) and  $\Delta clpB$  (green) backgrounds visualized using DNA plotter. Insertions are represented as peaks in TA dinucleotides distributed throughout the Mtb genome. Peaks that have the highest number of insertions in each library (indicated by the height of the spike) are shown in **Table S1**.**

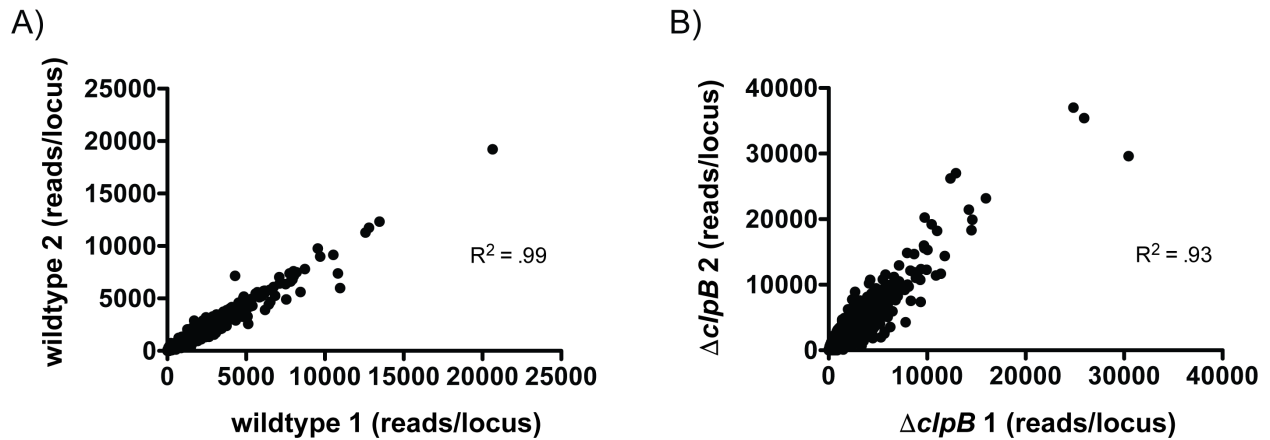

**Figure S2. Comparison of replicate transposon libraries based on number of TA insertions (reads) per gene in (A) wildtype and (B)  $\Delta clpB$  backgrounds. The  $R^2$  values are indicated in each graph.**

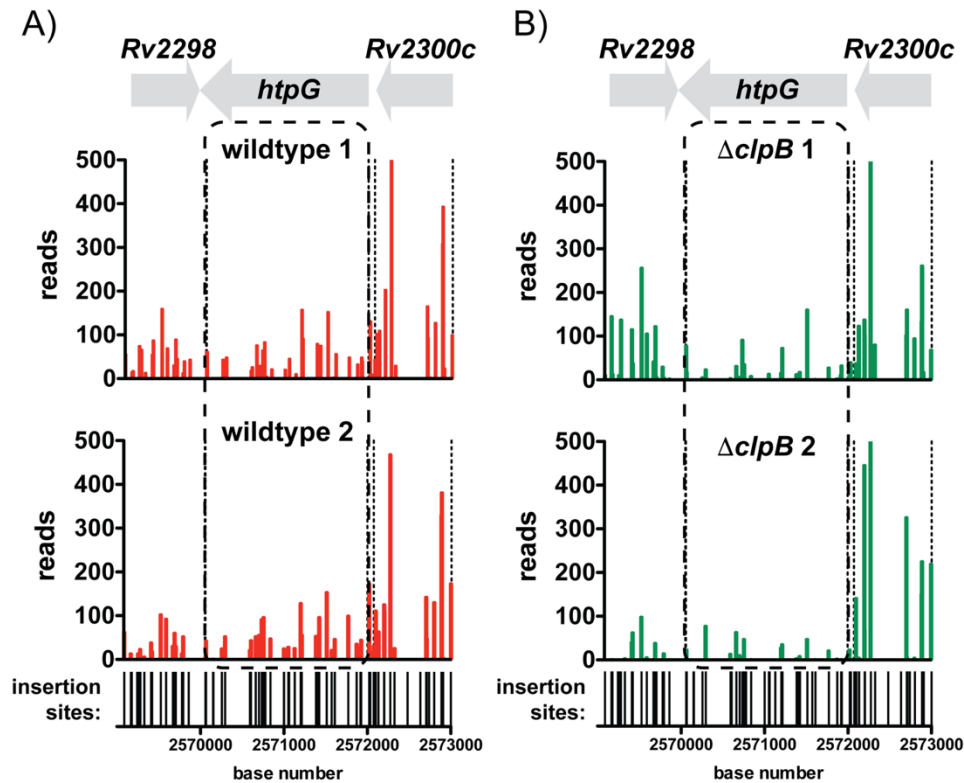

**Figure S3. Mutations in *htpG* are underrepresented in the *Mtb*  $\Delta clpB$  background relative to wildtype (H37RvN). Sequence reads at individual TA insertion sites (indicated at bottom) visualized in replicate transposon libraries in (A) wildtype and (B)  $\Delta clpB$  backgrounds with relevant loci highlighted above. Note that *htpG* (boxed) contains less insertions in the  $\Delta clpB$  compared to wild-type libraries. Dashed lines are cutoffs between indicated loci.**

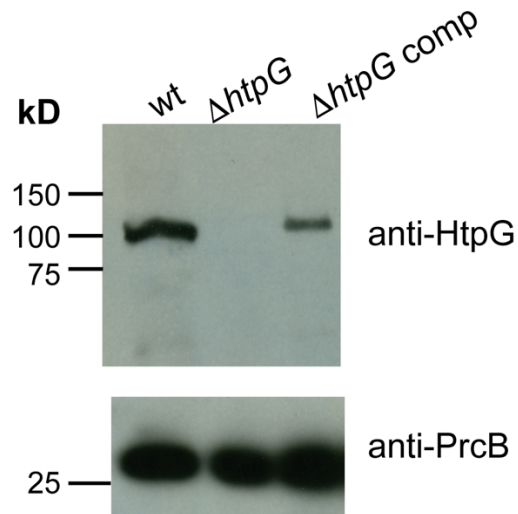

**Figure S4. Western blot of lysates of Mtb H37RvN wild-type,  $\Delta htpG$  and  $\Delta htpG$  complemented strains (comp or  $\Delta htpG::hsp60-htpG$ ) illustrate deletion of *htpG* in Mtb.** Strains were harvested at an OD580 of  $\sim 1.2$  for wild-type,  $\sim 0.6$  for  $\Delta htpG$  and  $\sim 0.7$  for the complemented strain. About 50  $\mu\text{g}$  of total protein in lysate was loaded per lane and was blotted using anti-HtpG and anti-PrcB (as a loading control). The *hsp60* promoter was chosen because the expected native promoter region of *htpG* did not produce significant levels of protein (when compared to the wild-type strain).

A)

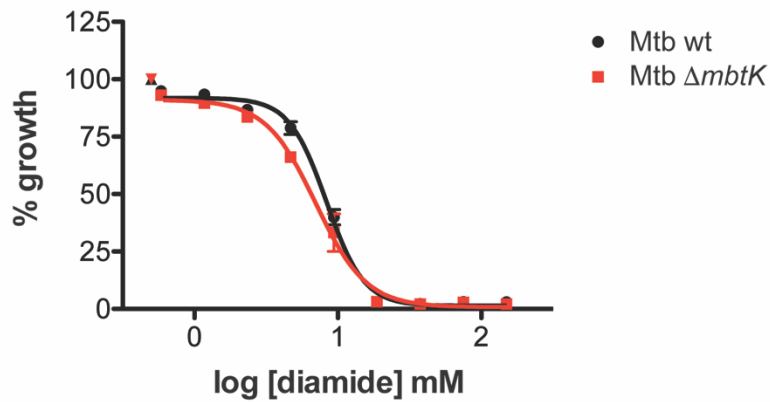

B)

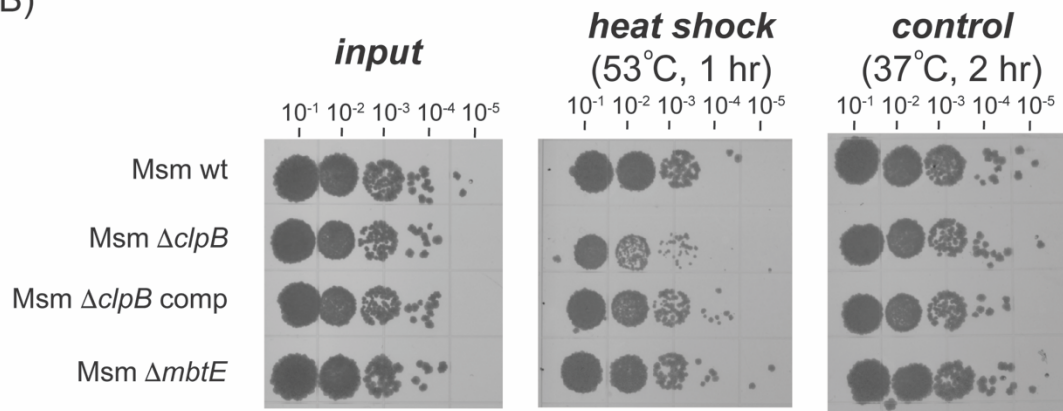

**Figure S5. Mycobacterial *mbt* deletion mutants do not demonstrate increased sensitivity to diamide or heat stress.** (A) Dose-response of diamide to Mtb wild-type (wt) and  $\Delta mbtK$  strains illustrates similar MIC90 (minimum inhibitory concentration at 90%) values for wt (18.4 mM) and  $\Delta mbtK$  (19.6 mM) ( $n = 3$ ). OD580 values were read after  $t = 9$  days at 37 °C to calculate percent growth. (B) Heat shock of indicated *M. smegmatis* (Msm) strains illustrates that cells lacking *clpB* are more sensitive to heat than wild-type, which is complemented in the “comp” strain; Msm lacking *mbtE* behaves like wild-type. Note that Msm cells have greater heat tolerance than Mtb cells, as seen in other work (Gebhard, Hümpel, McLellan, & Cook, 2008). Plates shown are representative of  $n = 6$  experiments.

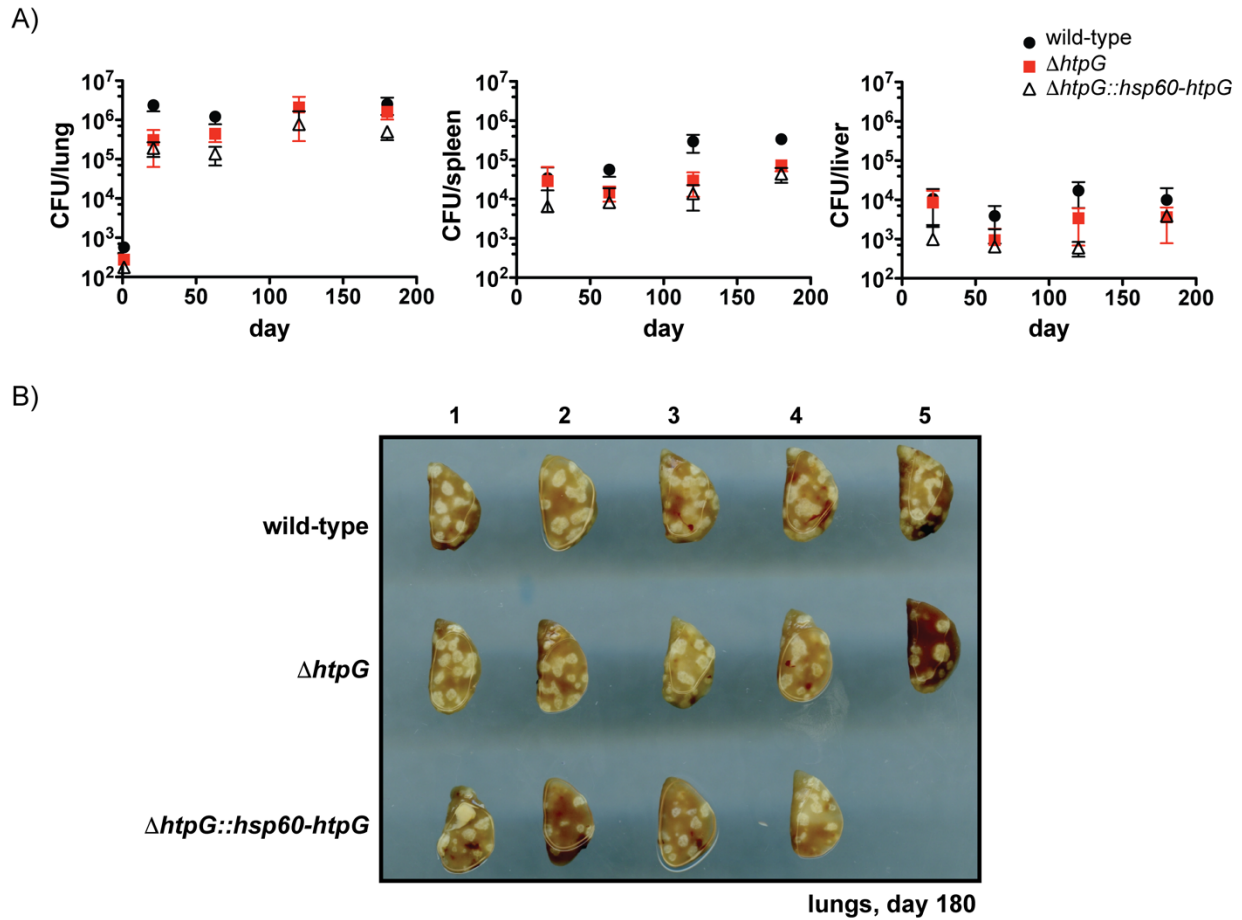

**Figure S6. Mtb cells lacking *htpG* replicate and persist similarly to wild-type Mtb in a C57BL/6 mouse infection model.** (A) Mtb wild-type (H37RvN),  $\Delta htpG$  and  $\Delta htpG$  complemented strains were used to infect mice over a 180 day time course as described in the supplemental methods section. At each time point, CFU/organ of bacteria were determined for 4-5 infected mice. (B) Lungs of sacrificed mice after 180 days of infection, with Mtb lesions shown in white.

|                    |                                                             |
|--------------------|-------------------------------------------------------------|
| H37RvN             | GTTTTTGATCTCGGTAGCCGCCGAGCTAGCCGGCATGCATGCACAGACCC          |
| KOhtpG             | GTTTTTGATCTCGGTAGCCGCCGAGCTAGCCGGCATGCATGCACAGACCC          |
| KOclpB             | GTTTTTGATCTCGGTAGCCGCCGAGCTAGCCGGCATGCATGCACAGACCC          |
| KOclpB (kanR)      | GTTTTTGATCTCGGTAGCCGCCGAGCTAGCCGGCATGCATGCACAGACCC          |
| KOclpBpre500htpG2  | GTTTTTGATCTCGGTAGCCG <b>T</b> CGAGCTAGCCGGCATGCATGCACAGACCC |
| KOclpBpre500htpG1  | GTTTTTGATCTCGGTAGCCG <b>T</b> CGAGCTAGCCGGCATGCATGCACAGACCC |
| KOclpBSNP (strepR) | GTTTTTGATCTCGGTAGCCG <b>T</b> CGAGCTAGCCGGCATGCATGCACAGACCC |
|                    | *****                                                       |

**Figure S7. Alignment of sequenced genomic DNA (*hspR* region) of strains described in this study shows a SNP in *Mtb ΔclpB* kanR strains after genetic manipulation.** While only a portion of the sequence is shown, only a single SNP exists, C→T, corresponding to mutation of Ala19Val in HspR. Above, H37RvN = wildtype; KOhtpG =  $\Delta$ *htpG*; KOclpB =  $\Delta$ *clpB* used in this study, which has resistant cassettes for hygromycin, nourseothricin and zeocin; KOclpB (kanR) is a new *Mtb ΔclpB* strain with a single kanamycin resistant cassette (and is the parent strain for the remaining strains listed); KOclpBpre500htpG2 and 1 are two clones of *Mtb ΔclpB* (kanR) containing an extra copy of *htpG* at the L5 site; KOclpBSNP (strepR) is the *Mtb ΔclpB hspR* SNP (A19V) strain characterized in **Figure 3** and is resistant to both kanamycin and streptomycin (has a streptomycin resistant cassette in place of *htpG* at the L5 site).

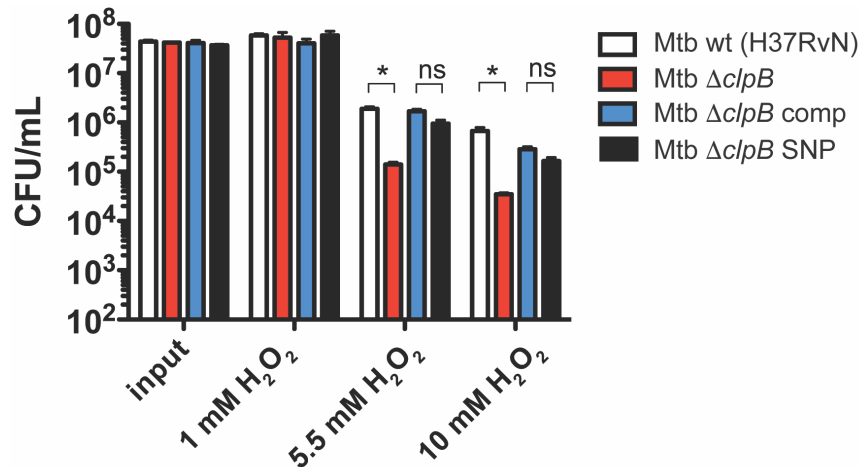

**Figure S8. A suppressor mutation in *Mtb hspR* protects *Mtb ΔclpB* from oxidative stress.** Indicated strains, including *Mtb ΔclpB hspR* A19V (SNP) were incubated in the presence of varying concentrations of H<sub>2</sub>O<sub>2</sub> for t = 4 hr prior to plating as described for **Figure 3A**. While *Mtb ΔclpB* strains are more sensitive to peroxide than wild-type,  $\Delta$ *clpB hspR* A19V cells behave similar to the complemented strain. (n = 3, error bars represents SD, \* p<0.0332, ns = non-significant Student's t-test was used for comparison.)

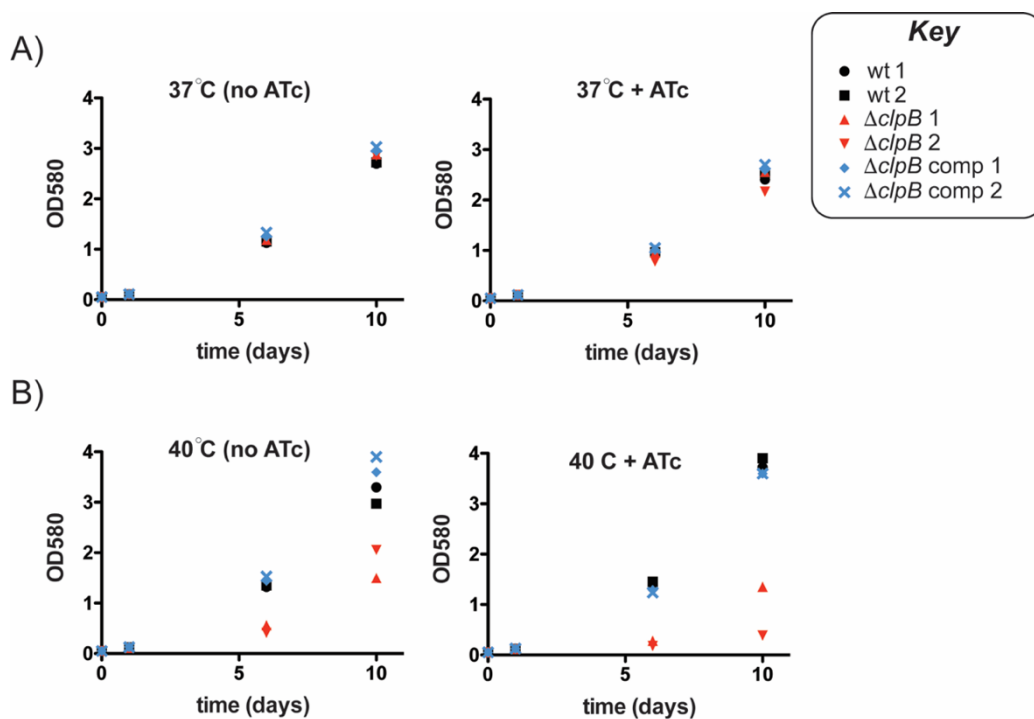

**Figure S9. Evaluation of single guide RNA (sgRNA) sequences targeting *htpG* in *Mtb* cells with and without *clpB* grown at different temperatures.** Indicated strains were diluted to OD = 0.05 on day 0 in the presence and absence of 100 ng/mL ATc and incubated at the indicated temperatures. For each strain, the number indicates the sgRNA sequence, each targeting the open reading frame (ORF) of *htpG* in wild-type,  $\Delta clpB$  and  $\Delta clpB$  complemented backgrounds. sgRNA1: GTTGGCGCGTCTCGCCGGTGGC; sgRNA2: GTTCCTCCTCGCTGTACGTGGAGCAAAC (both adjacent to PAM sequences predicted to be “strong” according to previous work) (Rock et al., 2017). Since sgRNA2 showed the greatest defects with heat, experiments were continued with sgRNA2.

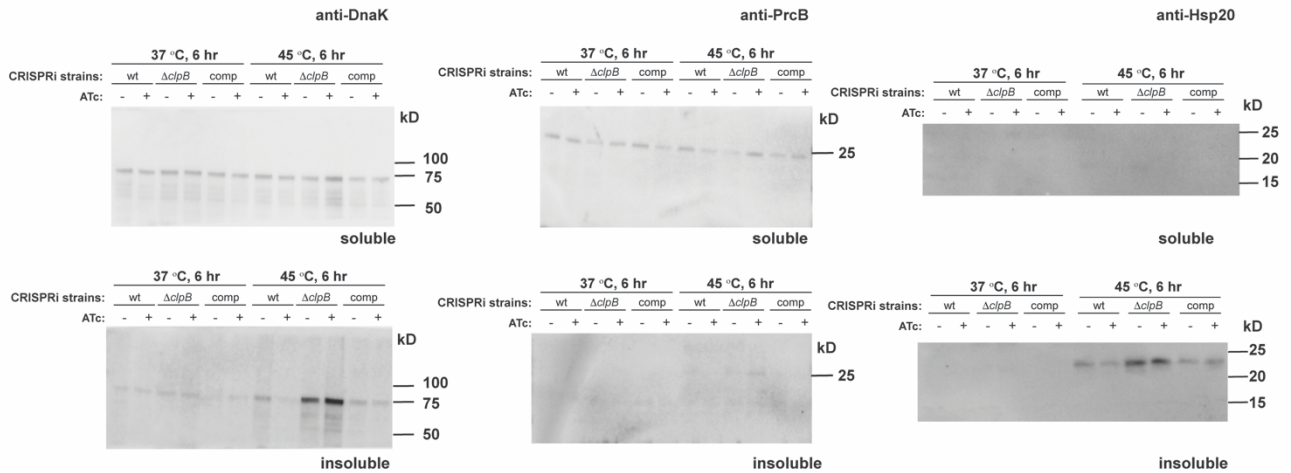

**Figure S10. Mtb cells lacking two chaperones show increased co-aggregation of chaperone DnaK and co-chaperone Hsp20 with insoluble proteins after heat shock.** Indicated Mtb CRISPRi strains were depleted of *htpG* upon addition of ATc as described in the main text, grown to late log phase and incubated at 37 or 45 °C for 6 hr prior to purification of lysate and fractionation to separate insoluble and soluble fractions. Western blot analysis revealed that increased levels of DnaK accumulate in the insoluble fraction of  $\Delta clpB$  strains, especially upon loss of HtpG under heat stress (left, plus ATc). DnaK is known to play an essential role in protein folding in mycobacteria (Fay & Glickman, 2014) and bacterial DnaK has been shown to associate with protein aggregates (Acebrón, Fernández-Sáiz, Taneva, Moro, & Muga, 2008). PrcB is a low molecular weight proteosomal subunit that is used as a loading control throughout this work, and does not appear to aggregate dramatically (middle). sHsp20 is a small heat shock protein, known to co-aggregate with misfolded proteins (Laskowska, Wawrzynów, & Taylor, 1996); we observe increased levels of sHsp20 in the insoluble fraction after heat shock, especially in strains lacking *clpB* (right). Coomassie staining was not used for analysis due to difficulties in visualizing changes in aggregated protein levels.



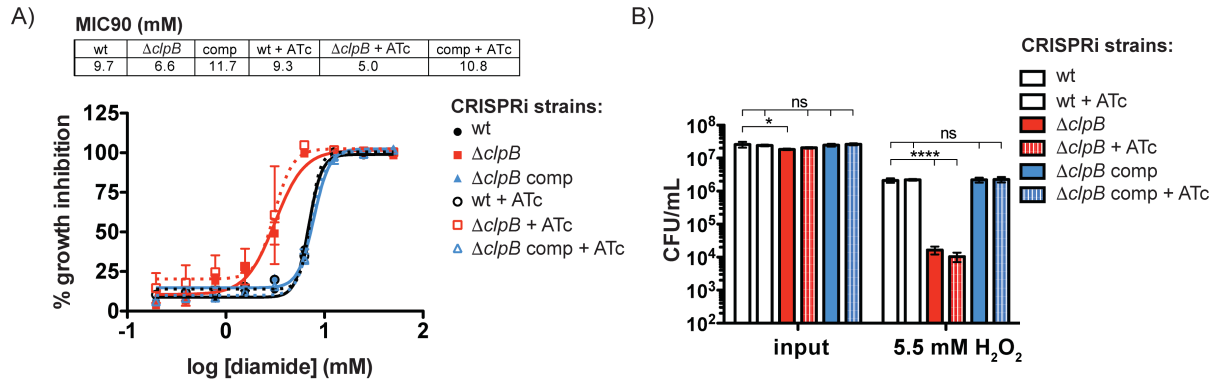

**Figure S11. Depletion of *htpG* from *Mtb* cells lacking *clpB* does not exacerbate growth defects in the presence of select oxidants.** (A) Dose response of indicated CRISPRi strains with and without ATc (addition of ATc leads to depletion of *htpG*) to varying concentrations of diamide ( $n = 3$ ). Loss of HtpG in addition to ClpB leads to only a minor increase in sensitivity to diamide compared to loss of ClpB alone. OD580 values were read after  $t = 11$  days at  $37^\circ\text{C}$  to calculate percent growth inhibition. (B) Colony forming units (CFU) per mL of indicated strains with and without ATc measured before and after  $t = 4$  hours of peroxide treatment show that  $\Delta clpB$  cells behave similarly with and without HtpG present. ( $n = 3$ , error bars indicate SD, \*  $p < 0.0332$ , \*\*\*\*  $p < 0.0001$ , one-way ANOVA was used for group comparison.)

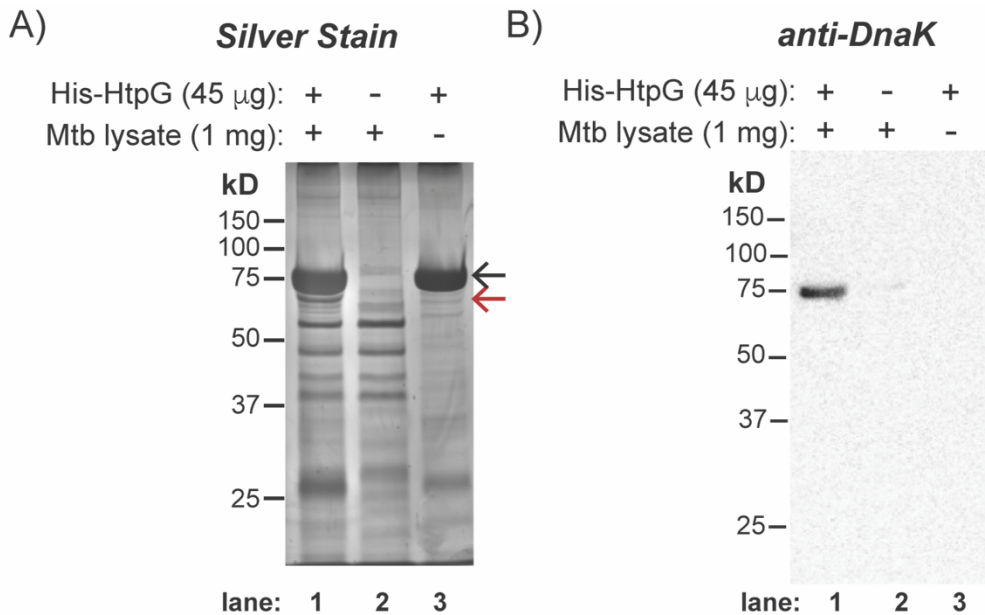

**Figure S12. *Mtb* His-HtpG interacts with *Mtb* DnaK in cellular lysates.** (A) Pull-down of mycobacterial proteins by Mtb-HtpG as analyzed by SDS-PAGE followed by silver staining of Ni-NTA elution fractions of indicated amounts of His-HtpG, Mtb lysate, or both co-incubated in the presence of excess ATP. In lane 1, His-HtpG (highlighted by black arrow) co-elutes with a band immediately underneath (red arrow) that is enriched relative to the lysate only sample (lane 2) and His-HtpG sample (lane 3). (B) Western blot analysis, using anti-DnaK, of a replicate experiment to that described in part A. There is enrichment of Mtb DnaK from lysate when His-HtpG is present (lane 1) compared to when it is absent (lane 2). This experiment was repeated for mass spectrometry analysis (**Table S5**) of the band indicated by the red arrow in part A.

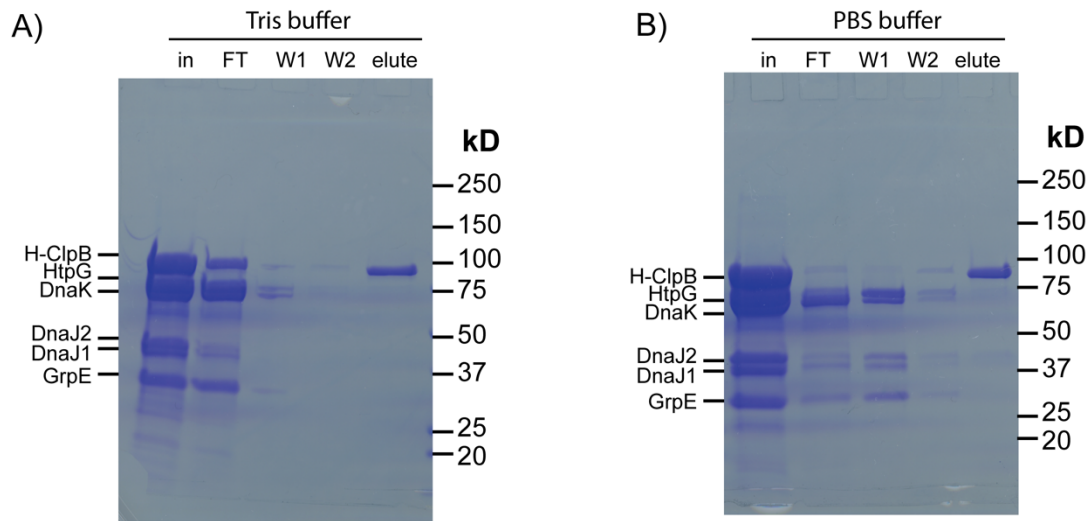

**Figure S13. Mtb His-ClpB does not interact with Mtb HtpG in vitro under conditions tested.** (A) His-ClpB was incubated with untagged HtpG, and known mycobacterial chaperone/cofactors DnaK, DnaJ1, DnaJ2, and GrpE for 2 hr at 37 °C in the presence of 1 mM ATP in 50 mM Tris (pH 8.0), 20 mM MgCl<sub>2</sub>, 100 mM NaCl (Tris buffer). The proteins were then incubated with Ni-NTA, which was washed twice with 20 mM imidazole in Tris buffer followed by elution in 200 mM imidazole in Tris buffer. Samples were analyzed by SDS-PAGE followed by Coomassie staining. (B) The experiment was performed as described in part A except using PBS buffer (pH 7.4) with 2 mM MgCl<sub>2</sub> in place of Tris buffer. In both parts A and B, His-ClpB eluted alone in the final elution step. (FT = Flow through, W = Wash, E = Elute).

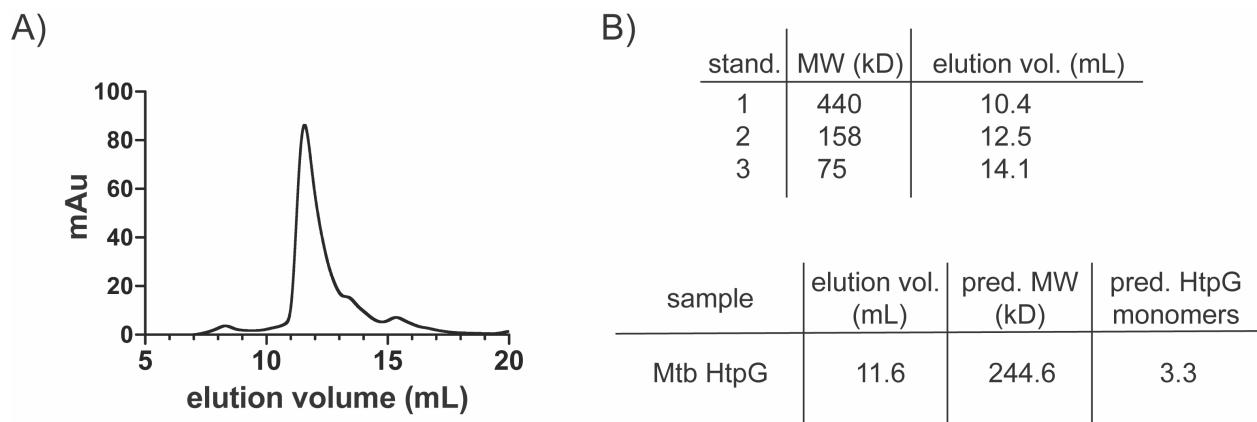

**Figure S14. Mtb HtpG elutes as an oligomer when analyzed by gel filtration chromatography.** After extensive dialysis to remove any bound nucleotide, 1 mg of Mtb HtpG was incubated in elution buffer prior to injection on a Superdex 200 10/300 GL column. Standard protein samples (ferritin, aldolase, conalbumin) (GE Healthcare) were analyzed under the same conditions and the resulting elution volume values were used to calculate the predicted molecular weight (MW) values of Mtb HtpG. Notably, the oligomeric state of Hsp90s cannot be accurately calculated by gel filtration analysis, as discussed in the main text.

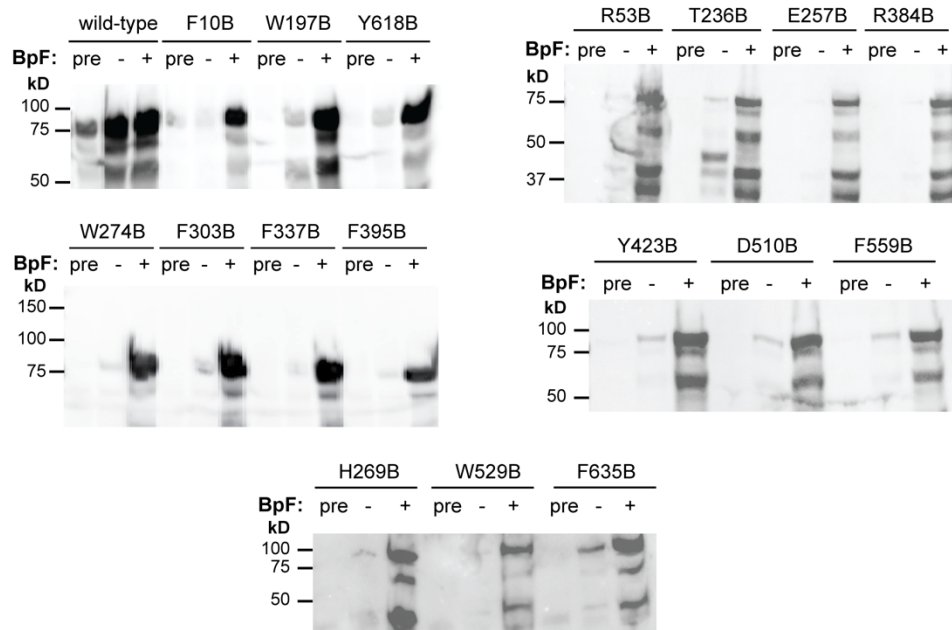

**Figure S15. A UV-activatable crosslinking unnatural amino acid can be incorporated site-specifically into Mtb HtpG.** Mtb HtpG with TAG mutations express as full-length proteins only in the presence of para-benzoyl-phenylalanine (BpF), otherwise there is premature termination of translation. Wild-type HtpG expresses whether or not BpF is present in the media (upper left), as expected. Briefly, LB (5 mL) supplemented +/- 0.8 mM BpF were inoculated with single colonies and incubated with shaking at 37 °C. At an OD600 > 0.2, cultures were induced with 1 mM IPTG and 0.2% arabinose for 3 hours at 37 °C with shaking. Samples were centrifuged and normalized by resuspension in a volume of 2x laemmli buffer (+0.05% beta-mercaptoethanol) that was based on the OD600 value of the culture prior to centrifugation. Samples (20 µL) were analyzed by SDS-PAGE (9% polyacrylamide) prior to immunoblotting using anti-His. Note that “pre” samples are those from +BpF media prior to induction.

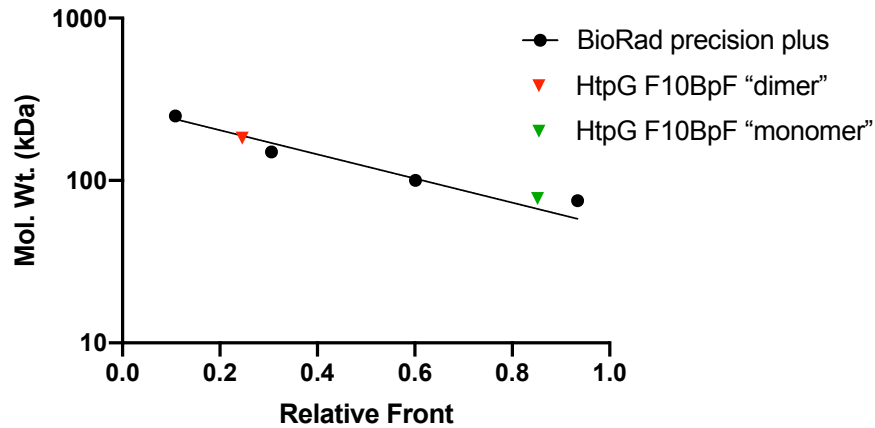

**Figure S16. Analysis of molecular weight standards by SDS-PAGE for prediction of “monomer” and “dimer” molecular weight values following UV crosslinking.** In the example above, Image Lab software (Bio-Rad) was used generate a standard curve with Precision Plus protein molecular weight standard ladder (black, Bio-Rad) to estimate the molecular weight of Mtb HtpG F10BpF before (~77.4 kDa, green) and after (~182.1 kDa, red) crosslinking. Actual molecular weight of wildtype HtpG is ~73.0 kD.

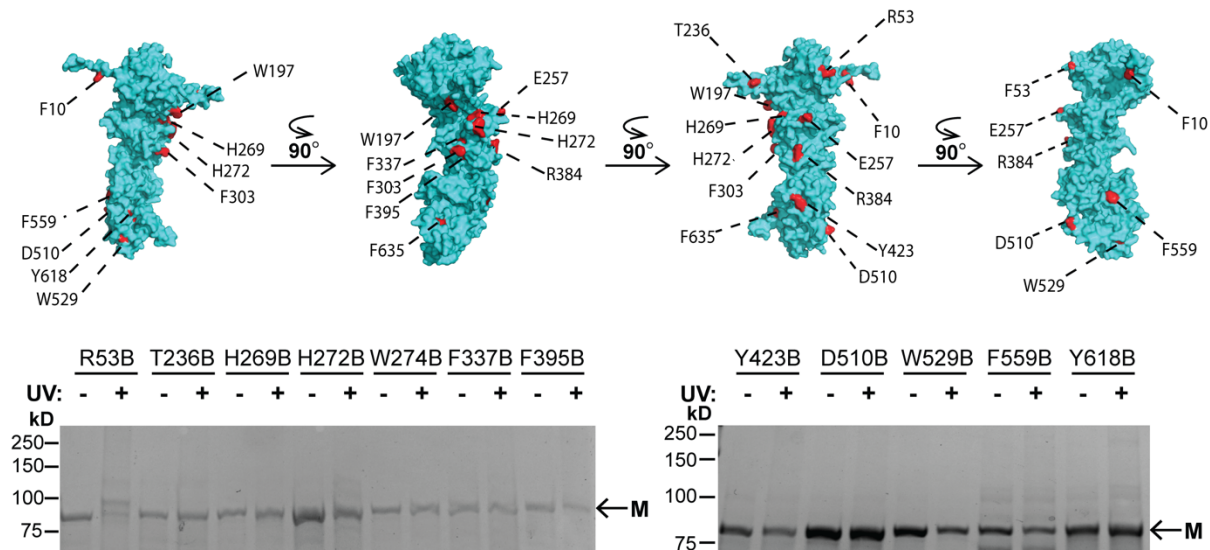

**Figure S17. Mtb HtpG monomers form a defined dimer interface.** SDS-PAGE analysis (bottom) of additional Mtb HtpG mutants (2  $\mu$ M) containing BpF (B) at indicated positions (top) in buffer containing 5 mM ATP shows that residues on faces other than that shown in **Figure 5A-B** do not form homodimers following UV irradiation. M = HtpG monomer.

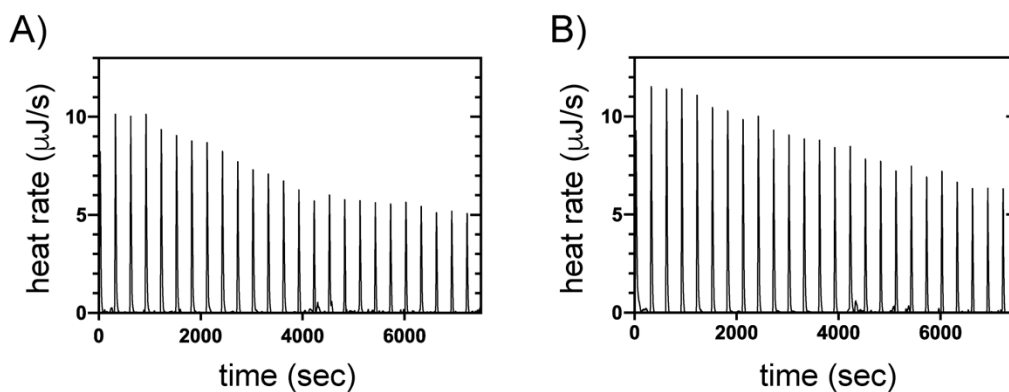

**Figure S18. Replicate isothermal titration calorimetry data for addition of geldanamycin (GA) to Mtb HtpG.** GA (750  $\mu\text{M}$ ) was titrated into Mtb HtpG (47  $\mu\text{M}$ ) at 25  $^{\circ}\text{C}$ . The  $K_D$  average  $\pm$  standard deviation (SD) values were calculated based on addition of GA into Mtb HtpG under identical conditions, described in the Methods section, performed in triplicate.

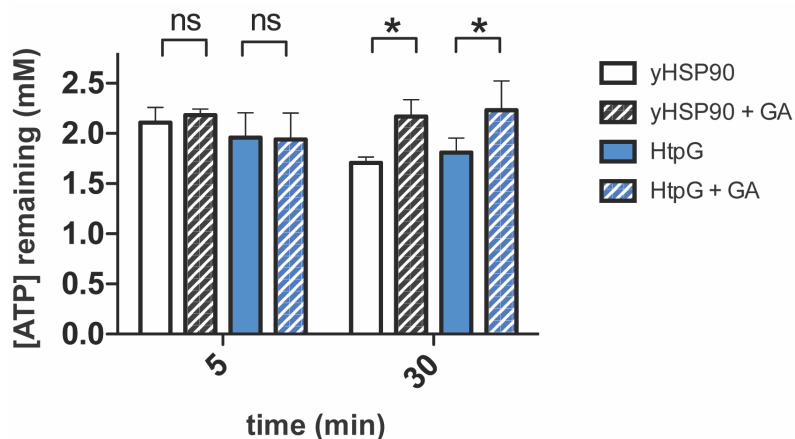

**Figure S19. Similar to yeast Hsp90, Mtb HtpG exhibits weak ATPase activity that is inhibited by GA.** Yeast Hsp90 or Mtb HtpG was incubated with or without GA (180  $\mu\text{M}$ ) and 2 mM ATP in buffer (40 mM HEPES-KOH, pH 7.5, 2 mM  $\text{MgCl}_2$ ) at 30  $^{\circ}\text{C}$  and remaining ATP was calculated at indicated time points using Kinase-Glo (Promega) reagent. (n = 4, error bars indicated SD, \*  $p < 0.0332$ , one-way ANOVA was used for comparison.)

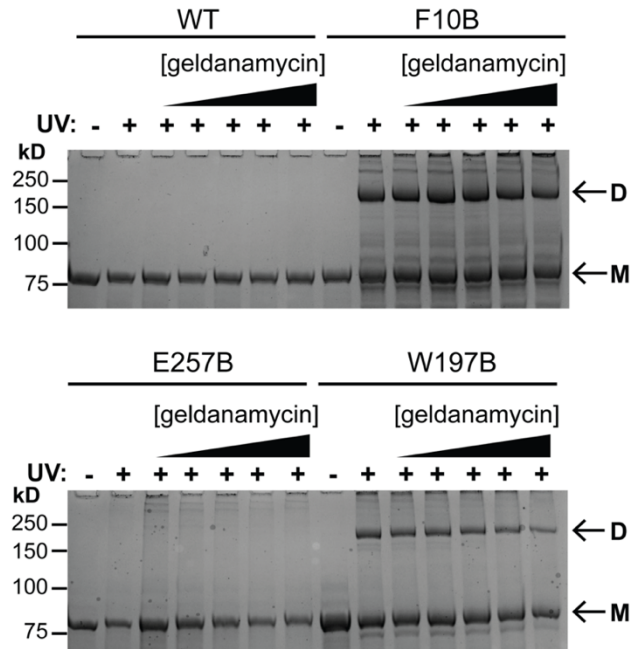

**Figure S20. Titration of GA into indicated Mtb HtpG wild-type and select BpF mutants does not produce an observable change in dimer formation.** Mtb HtpG wild-type and BpF mutants were incubated with geldanamycin (0, 10, 50, 100, 200, 400 μM), exposed to UV irradiation (365 nm), and compared to samples without GA in the absence of UV treatment. M = HtpG monomer; D = HtpG dimer.

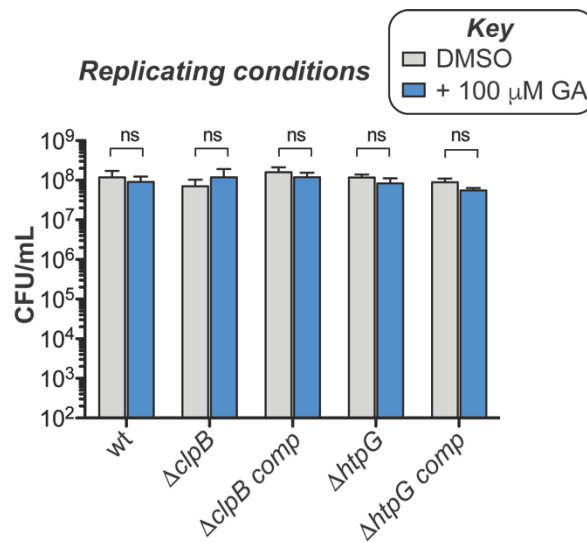

**Figure S21. Addition of GA does not affect survival of cells under replicating conditions.** CFU analysis of strains under replicating conditions demonstrates that there is no significant change in survival of indicated strains with or without GA added under replicating conditions, as expected. ns indicates not significant, two-way ANOVA was used for group comparison (n = 3, error bars represent SD).

### **Supplemental Methods:**

**Infection of mice with *Mtb*.** C57BL/6 8-week-old female mice (Jackson Laboratories) were infected by aerosol using a Glas-Col inhalation exposure system with log phase *Mtb* cultures prepared as single-cell suspensions in PBS to deliver 100–200 bacilli per mouse. To quantify bacteria, serial dilutions of lung, spleen and liver homogenates were cultured on 7H10 plates containing 10% (vol/vol) oleic acid-albumin-dextrose-catalase (OADC) (Difco) and 0.5% glycerol. After 21 days of incubation of the plates at 37 °C, the CFUs were enumerated.

The left lobe of the mouse lungs was fixed in 10% formalin in PBS and used for staining with hematoxylin and eosin. Procedures involving mice were performed as according to National Institutes of Health guidelines for housing and care of laboratory animals and were reviewed and approved by the Institutional Animal Care and Use Committee of Weill Cornell Medical College.

**Gel filtration chromatography analysis of *Mtb* HtpG.** Nucleotide free HtpG (2 mg/mL) (see Methods section), in storage buffer (25 mM 4-(2-hydroxyethyl)-1-piperazineethanesulfonic acid (HEPES), 150 mM NaCl, 5 mM MgCl<sub>2</sub>, 10% glycerol, pH 8) (0.5 mL) was analyzed by an AKTA Pure FPLC 15L instrument (GE Healthcare) using a Superdex 200 10/300 GL gel filtration column (GE Healthcare) equilibrated in the storage buffer at a flow rate of 0.3 mL/min. The elution volume of protein sample was monitored using absorption at 280 nm. High molecular weight standards (GE Healthcare), ferritin (440 kDa, 0.4 mg/mL), aldolase (158 kDa, 4 mg/mL) and conalbumin (75 kDa, 3 mg/mL), were analyzed by gel filtration chromatography under the same conditions. The void volume was determined by applying bromophenol blue to the column. The elution volume of the void volume and standards were used to estimate the molecular weight and oligomerization state of HtpG following the manufacturer's protocol.

**Assessment of library saturation and visualization using DNA plotter.** The complexity of each transposon library was evaluated by calculating the number of transposon cassette insertions into TA dinucleotides as has been previously described using custom Python and MATLAB scripts (Kieser et al., 2015; Pritchard et al., 2014). DNAPlotter was used to generate

images of circular mycobacterial genomes sites of transposon insertions as described in a previous report (Carver, Thomson, Bleasby, Berriman, & Parkhill, 2009).

**Minimum inhibitory concentration (MIC) assessment of Mtb strains.** Briefly, for CRISPRi strains, cells were inoculated in 7H9 complete at a final OD580 = 0.05 in triplicate and incubated at 37 °C with or without ATc (100 ng/μL). On day 5, cells were centrifuged (3100 × g, 5 min), resuspended in fresh 7H9 complete and diluted to an OD580 of 0.06. For other strains, cells were grown to log-phase prior to dilution to OD580 = 0.06. Cells were added to clear 96-well plates (Costar) to a final OD580 = 0.03 in 200 μL final volume 7H9 complete +/- ATc (100 ng/mL) (some MIC experiments were done at an initial OD580 = 0.05). Indicated concentrations of compound were added to each well, with water used as a control. Cells were incubated without shaking at 37 °C for t = 11 days and the absorbance at 580 nm values were measured using a SpectraMax M2 microplate reader (Molecular Devices) and analysis was performed with SoftMax Pro software. Curve fitting was performed using Prism (GraphPad).

**Cloning, Expression and Purification of Mtb His<sub>6</sub>-HtpG.** An overexpression plasmid for His-HtpG was constructed using overlap extension PCR cloning techniques (Bryksin & Matsumura, 2010) with pET47b plasmid (Novagen) and indicated primer pairs 47 and 48 (**Table S9**) following amplification from chromosomal H37RvN DNA. Following PCR steps and DpnI treatment, DNA samples were purified using a PCR purification kit (Qiagen) and transformed into Mach1 competent cells (Invitrogen). Following confirmation of gene insertion by DNA sequencing, the selected plasmid was transformed into BL21(DE3) competent cells (Novagen) for overexpression. A 5 mL overnight culture of cells was used to inoculate 500 mL LB (kanamycin 25 μg/mL), which was grown at 37 °C with shaking to OD600 ~ 0.2 prior to lowering temperature to 18 °C. Cells were induced with 0.01 mM IPTG (isopropyl-β-D-thiogalactoside) for 20 hr at 18 °C and were then harvested by centrifugation (3100 × g, 10 min, 4 °C). Pellets were resuspended on ice in 15 mL of lysis buffer (25 mM Tris (tris(hydroxymethyl)aminomethane) (pH = 8.0), 400 mM NaCl, 10%



glycerol) supplemented with 100 µg/mL lysozyme and 3 µg/mL DNaseI. Cells were rocked for at least 20 min at 4 °C and lysed by sonication on ice using a 30 sec interval program at an amplitude of 5 for 10 min total. Samples were then ultracentrifuged at 39,191 × g for 30 min at 4 °C. Resulting supernatants of each were added to 1.5 mL washed Ni-NTA agarose resin (Qiagen) with 2 mM added imidazole and rocked at 4 °C for 1 hr. Resin was then washed with 30 mL wash buffer (30 mM imidazole in lysis buffer) and His<sub>6</sub>-tagged proteins were eluted with 10 mL elution buffer (200 mM imidazole in lysis buffer). The eluate fractions were dialyzed against 1 L lysis buffer overnight using a 10 kD MWCO Slide-A-Lyzer dialysis cassette (Pierce). Protein samples were concentrated to <1 mL using 10 kD MWCO Amicon Ultra Centrifugal Filter Device (Millipore) at 4 °C. Concentration was determined using BSA as a standard in the *DC* protein assay (Bio-Rad). Protein aliquots were flash frozen in N<sub>2</sub>(l) and stored at -80 °C.

**Purification of Mtb lysates for pull-down experiments.** Mtb lysate was purified using a standard mycobacterial protocol. Briefly, a 50 mL culture of H37RvN was grown to log phase (OD<sub>580</sub> = 0.6-1.0) in 7H9 complete. Cells were centrifuged (3100 × g, 5 min) and washed with 30 mL of PBS + 0.05% tween-80 twice followed by centrifugation. The pellet was then resuspended in 1 mL of lysis buffer B (25 mM Tris (pH 7.5), 1 mM ethylenediaminetetraacetic acid (EDTA) (pH 8), 1 mM phenylmethylsulfonyl fluoride (PMSF)). Cell suspensions were added to sealed 2.0 mL microtubes tubes (Sarstedt) with approximately 250 µL of zirconia/silica beads (1 mm, BioSpec) prior to lysis by three rounds (high setting for 30 sec) of bead beating (Mini-BeadBeater-1, BioSpec) with cooling on ice in between each round. Samples were centrifuged at 20,000 × g (30 sec) to pellet beads, and resulting supernatants were transferred to microfuge tubes and spun at 20,000 × g (1 min) to pellet remaining whole cells. Finally, supernatant was added to a Spin-X centrifuge tube with a 0.22 µm nitrocellulose filter (Corning, Costar) and spun at 10,000 × g for 5 min. Total protein concentration was estimated using BSA as a standard in PBS buffer with the *DC* protein assay (Bio-Rad). For pull-down experiments, indicated amounts

of His-HtpG, Mtb lysate, or both were co-incubated in the presence of 1 mM ATP in PBS (pH 7.4) and 2 mM MgCl<sub>2</sub> for 1 hr at RT prior to incubation with Ni-NTA (Qiagen), washing with 20 mM imidazole twice and elution with 200 mM imidazole. Silver staining was performed using common biochemical protocols and western blotting was carried out as detailed in the main text.

**Fractionation of Mtb CRISPRi strain lysates following heat shock prior to western blot analysis.** Indicated Mtb CRISPRi strains were diluted in duplicate to a final volume 20 mL 7H9 complete to an OD<sub>580</sub> = 0.05 in T75 flasks (Corning) and incubated at 37 °C with or without ATc (100 ng/μL). On day 5, OD<sub>580</sub> values were measured (values were in the range of 1.2-2) and cells were incubated at 37 °C or 45 °C for 6 hours. Cells were then centrifuged (3100 × g, 5 min) and lysates were purified as described in the section above, except that 10% glycerol was added the lysis buffer (lysis buffer B). Total protein concentration was estimated using BSA as a standard in PBS buffer with the *DC* protein assay (Bio-Rad). In order to fractionate these samples, we modified a previously published protocol (Fay & Glickman, 2014). Briefly, 2.5 mg/mL of each sample was added to lysis buffer to a final volume of 120 μL. Samples were ultracentrifuged (200,000 × g, 2 hours, 4 °C), and resulting soluble and insoluble fractions were treated separately. The soluble fraction was removed and 20 uL of sample was added to 10 uL 2x laemmli sample buffer (+0.05% beta-mercaptoethanol). Insoluble fractions were resuspended in 60 uL lysis buffer supplemented with 1% Triton X-100, vortexed, and sonicated for 30 minutes. Following sonication, 20 uL 2x laemmli sample buffer (+0.05% beta-mercaptoethanol) was added to each insoluble fraction. Soluble and insoluble samples were boiled for 1 hour and subjected to western blotting. For western blot analysis, 30 μL of each soluble sample and 40 μL of each insoluble sample were loaded on 4-20% polyacrylamide gels and run at 150 V for 65 min. Immunoblotting was performed as described before with the following dilutions of primary antibodies in 2.5% milk fat: anti-DnaK (1:20K), anti-Acr2 (Mtb Hsp20 antibody, Novus Biologicals) (1:1K), and anti-PrcB

(1:10K). Anti-rabbit HRP (1:10K) in the same buffer was used as a secondary antibody in each experiment.

**Purification of recombinant Mtb chaperones and in vitro pull-down experiment.** Mtb DnaK, DnaJ1, DnaJ2, GrpE and ClpB were overexpressed and purified as described previously (Lupoli et al., 2016). Proteins were aliquoted, flash frozen in  $N_2(l)$  and stored at minus 80 °C for use in the experiments shown here. In vitro pulldown experiments were performed using indicated conditions and a previously described method (Lupoli et al., 2016).

**Expression and purification of yeast Hsp90 (yHsp90).** Expression constructs of yHsp90 (pACYC-T7 yHsp90) (Wayne & Bolon, 2007) were transformed in *E. coli* BL21(DE3) cells. A 5 mL overnight culture of cells was used to inoculate 500 mL LB (50  $\mu$ g/mL carbenicillin), which was grown at 37 °C with shaking to OD600 ~ 0.8 prior to lowering temperature to 25 °C. Cells were induced with 0.25 mM IPTG for 3 hr. Following harvesting, cells were resuspended and sonicated in lysis buffer (25 mM Tris (pH 8.0), 400 mM NaCl, 10% glycerol), supplemented with 1 mM PMSF, protease inhibitor cocktail (EDTA free), 100  $\mu$ g/mL lysozyme and 3  $\mu$ g/mL DNaseI. The insoluble fraction was removed by centrifugation at  $10,976 \times g$  for 30 min. Resulting cell lysates were purified using 2.0 mL washed Ni-NTA agarose resin. Resin was then washed with 30 mL wash buffer (30 mM imidazole in lysis buffer) and His<sub>6</sub>-tagged proteins were eluted with 10 mL elution buffer (200 mM imidazole in lysis buffer). The elution fraction was dialyzed against 4 L buffer (25 mM Tris (pH 8.0), 150 mM NaCl, 10% glycerol) and further purified using a Superdex 200 10/300 GL gel filtration column (GE Healthcare). Concentration was determined using BSA as a standard in the DC protein assay (Bio-Rad). Protein aliquots were flash frozen in  $N_2(l)$  and stored at -80 °C.

**ATPase experiments with Mtb HtpG and yeast Hsp90.** Recombinant Mtb HtpG (5  $\mu$ M) or yHSP90 (5  $\mu$ M) were incubated at 30 °C in 40 mM HEPES-KOH, pH 7.5, 2 mM MgCl<sub>2</sub> with or without 180  $\mu$ M GA. Reactions were initiated by the addition of 2 mM ATP and were quenched

by the addition of 0.05% formic acid at indicated time points. Concentration of ATP was calculated using ATP standards followed by addition of Kinase-Glo (Promega) reagent according to manufacturer's instruction. Luminescence was read on a FlexStation 3 Microplate Reader (Molecular Devices) and analysis was performed with SoftMax Pro software. Curve fitting was performed using Prism.

## References:

- Acebrón, S. P., Fernández-Sáiz, V., Taneva, S. G., Moro, F., & Muga, A. (2008). DnaJ recruits DnaK to protein aggregates. *J Biol Chem*, *283*(3), 1381-1390. doi:10.1074/jbc.M706189200
- Bryksin, A. V., & Matsumura, I. (2010). Overlap extension PCR cloning: a simple and reliable way to create recombinant plasmids. *Biotechniques*, *48*(6), 463-465. doi:10.2144/000113418
- Carver, T., Thomson, N., Bleasby, A., Berriman, M., & Parkhill, J. (2009). DNAPlotter: circular and linear interactive genome visualization. *Bioinformatics*, *25*(1), 119-120. doi:10.1093/bioinformatics/btn578
- Chin, J. W., Martin, A. B., King, D. S., Wang, L., & Schultz, P. G. (2002). Addition of a photocrosslinking amino acid to the genetic code of Escherichiacoli. *Proc Natl Acad Sci U S A*, *99*(17), 11020-11024. doi:10.1073/pnas.172226299
- Fay, A., & Glickman, M. S. (2014). An essential nonredundant role for mycobacterial DnaK in native protein folding. *PLoS Genet*, *10*(7), e1004516. doi:10.1371/journal.pgen.1004516
- Gebhard, S., Hümpel, A., McLellan, A. D., & Cook, G. M. (2008). The alternative sigma factor SigF of Mycobacterium smegmatis is required for survival of heat shock, acidic pH and oxidative stress. *Microbiology*, *154*(Pt 9), 2786-2795. doi:10.1099/mic.0.2008/018044-0
- Kieser, K. J., Baranowski, C., Chao, M. C., Long, J. E., Sassetti, C. M., Waldor, M. K., . . . Rubin, E. J. (2015). Peptidoglycan synthesis in Mycobacterium tuberculosis is organized into networks with varying drug susceptibility. *Proc Natl Acad Sci U S A*, *112*(42), 13087-13092. doi:10.1073/pnas.1514135112
- LaMarca, B. B., Zhu, W., Arceneaux, J. E., Byers, B. R., & Lundrigan, M. D. (2004). Participation of fad and mbt genes in synthesis of mycobactin in Mycobacterium smegmatis. *J Bacteriol*, *186*(2), 374-382. doi:10.1128/jb.186.2.374-382.2004
- Laskowska, E., Wawrzynów, A., & Taylor, A. (1996). IbpA and IbpB, the new heat-shock proteins, bind to endogenous Escherichia coli proteins aggregated intracellularly by heat shock. *Biochimie*, *78*(2), 117-122. doi:10.1016/0300-9084(96)82643-5
- Lopez Quezada, L., Li, K., Lupoli, T., Edo, Z., Li, X., Gold, B., . . . Aube, J. (2020). Activity-Based Protein Profiling Reveals That Cephalosporins Selectively Active on Non-replicating Mycobacterium tuberculosis Bind Multiple Protein Families and Spare Peptidoglycan Transpeptidases. *Front. Microbiol.*, *11*. 1248. doi:doi.org/10.3389/fmicb.2020.01248
- Lupoli, T. J., Fay, A., Adura, C., Glickman, M. S., & Nathan, C. F. (2016). Reconstitution of a Mycobacterium tuberculosis proteostasis network highlights essential cofactor interactions with chaperone DnaK. *Proc Natl Acad Sci U S A*, *113*(49), E7947-E7956. doi:10.1073/pnas.1617644113

- Muona, M., Aranko, A. S., & Iwai, H. (2008). Segmental isotopic labelling of a multidomain protein by protein ligation by protein trans-splicing. *Chembiochem*, 9(18), 2958-2961. doi:10.1002/cbic.200800604
- Pritchard, J. R., Chao, M. C., Abel, S., Davis, B. M., Baranowski, C., Zhang, Y. J., . . . Waldor, M. K. (2014). ARTIST: high-resolution genome-wide assessment of fitness using transposon-insertion sequencing. *PLoS Genet*, 10(11), e1004782. doi:10.1371/journal.pgen.1004782
- Rock, J. M., Hopkins, F. F., Chavez, A., Diallo, M., Chase, M. R., Gerrick, E. R., . . . Fortune, S. M. (2017). Programmable transcriptional repression in mycobacteria using an orthogonal CRISPR interference platform. *Nat Microbiol*, 2, 16274. doi:10.1038/nmicrobiol.2016.274
- Vaubourgeix, J., Lin, G., Dhar, N., Chenouard, N., Jiang, X., Botella, H., . . . Nathan, C. (2015). Stressed mycobacteria use the chaperone ClpB to sequester irreversibly oxidized proteins asymmetrically within and between cells. *Cell Host Microbe*, 17(2), 178-190. doi:10.1016/j.chom.2014.12.008
- Venugopal, A., Bryk, R., Shi, S., Rhee, K., Rath, P., Schnappinger, D., . . . Nathan, C. (2011). Virulence of *Mycobacterium tuberculosis* depends on lipoamide dehydrogenase, a member of three multienzyme complexes. *Cell Host Microbe*, 9(1), 21-31. doi:10.1016/j.chom.2010.12.004
- Wayne, N., & Bolon, D. N. (2007). Dimerization of Hsp90 is required for in vivo function. Design and analysis of monomers and dimers. *J Biol Chem*, 282(48), 35386-35395. doi:10.1074/jbc.M703844200
- Xu, W., DeJesus, M. A., Rücker, N., Engelhart, C. A., Wright, M. G., Healy, C., . . . Ehrt, S. (2017). Chemical Genetic Interaction Profiling Reveals Determinants of Intrinsic Antibiotic Resistance in *Mycobacterium tuberculosis*. *Antimicrob Agents Chemother*, 61(12).e01334-17. doi:10.1128/AAC.01334-17
